# Supplementary material
Source: ML conference proceedings conference paper supplement (https://openreview.net/forum?id=2EiqizElGO)
Supplement: supplementary_material [file attachment]

---

# ViSt3D: Video Stylization with 3D CNN

## Supplementary Material

---

**Ayush Pande**  
IIT Kanpur  
ayushp@cse.iitk.ac.in

**Gaurav Sharma**  
TensorTour & IIT Kanpur  
gaurav@tensortour.com

## 1 Dataset

### 1.1 Generating Motion clips

The algorithm for generating motion clips is given in Algorithm 1. It randomly samples a video as input and generates a random video clip from the input video. We used PySceneDetect library [1] to detect shot boundaries in the video. Algorithm 2 is used to generate a HSV image from the given flow of pair of consecutive frames of the video clip generated by Algorithm 1. Algorithm 3 is the key algorithm which decides whether the generated random video clip has strong motion or not.

### 1.2 Details

In this Algorithm 1, we select a 16-frame clip from the video that exhibits strong motion. We consider up to 15,999 frames from each video. We utilize the PySceneDetect library [1] to generate shots from the video. Additionally, we employ Transnet-v2 [3], which is a deep learning-based method for shot detection, to achieve more accurate results. Afterwards, we sort the list of shots obtained from the above detection algorithms. We randomly select up to 9 shots to find a strong motion clip in the video. If no such clip is found, we assume that there is no desired strong motion clip in the considered video. To determine whether a clip has strong motion, we utilize the Farneback's algorithm [2] to generate flow maps for the video clip under consideration.

To interpret this flow map, we use Algorithm 2 to highlight areas in the image with strong and low motion. From the output of the *draw\_hsv* algorithm, we are able to easily interpret which areas of the motion pair have strong motion, represented by colors near red, and low motion, represented by colors near blue when visualized. We also utilize Algorithm 3 that employs thresholds to determine whether the motion qualifies as strong motion and whether a clip can be classified as a strong motion clip.

The *Approve* Algorithm 3 takes the output of the *draw\_hsv* Algorithm 2 as input. We perform the following steps for each frame in the clip.

First, we calculate the variance in the pixel values of the image. We take this as a proxy indicating motion in the video. If the variance is greater than 100, a threshold determined by initial experiments, it indicates the presence of areas with strong motion and weak motion in the image. This calculation is done to account for the relative strength of motion in pixels compared to other pixels.

Next, we find the unique pixel values in the image along with their frequencies. Then, we calculate the sum of frequencies for all pixels whose values are greater than 80 and store the result in the *sums* array.

After that, we iterate through the *sums* array and increment the *approve* variable if the sum is greater than 20000. Then, we check if the value of *approve* is greater than 9, which indicates the presence of more than 9 frames with strong motion. If this condition is satisfied, we consider the clip to have strong motion and add it to our dataset.

---

**Algorithm 1** Generate motion clip(total\_frames, video\_path)

---

```
end ← min(15999, total_frames) {Number of frames of video to be processed}
if end = 0 then
    return
end if
scenes ← scenedetect(video_path, end) {scenedetect function output a list of shots and its
other parameters. Each entry of scenes list is another list with data like [start_time, end_time,
num_frames]}
sort(scenes, key=lambda x: x[2], reverse=True) {sort function sorts the shots by shot length in
descending order}
run_times = 0
while run_times < min(9, len(scenes)) do
    start = scenes[run_times][0]
    end = scenes[run_times][1]
    num_frames = scenes[run_times][2]
    if num_frames ≤ 17 then
        return False
    end if
    frame_start = randint(start + 1, end - 16) {randint generate random number between the
two input numbers}
    images = ARRAY[]
    imgs = ARRAY[]
    video = load_video(video_path)
    for i = 0 to frame_start do
        ret, prev = read_i(video) {we are reading the  $i^{th}$  frame in the video}
    end for
    ret, prev = read(video) {we are reading the frame whose position in video is given by
frame_start}
    append(images, bgr_to_rgb(prev)) {converting prev from bgr to rgb}
    prevgray = bgr_to_gray(prev) {converting frame to grayscale}
    for i = 0 to frame_count - 1 do
        ret, suc = read_i(video)
        append(images, bgr_to_rgb(suc))
        sucgray = bgr_to_gray(suc)
        flow = calcOpticalFlowFarneback(prevgray, sucgray, None, 0.5, 3, 15, 3, 5, 1.2, 0)
        {Calling farneback algorithm for evaluating the flow between frames}
        prevgray = sucgray
        hsv_img = draw_hsv(flow) {Algorithm mentioned in 2}
        append(imgs, hsv_img)
    end for
    if len(images) < frame_count then
        return FALSE
    end if
    if approve(imgs, frame_count) then
        return (TRUE, outpath, filename, images, frame_start) {Algorithm mentioned in 3}
    else
        run_times = run_times + 1
    end if
end while
```

---

---

**Algorithm 2** draw\_hsv (flow)

---

```
h, w = flow.shape[: 2]
fx, fy = flow[:, :, 0], flow[:, :, 1]
ang = arctan2(fy, fx) +  $\pi$ 
v = sqrt(fx * fx + fy * fy)
hsv = zeros((h, w, 3), uint8)
hsv[:, :, 0] = ang * (180/ $\pi$ /2)
hsv[:, :, 1] = 255
hsv[:, :, 2] = min(v * 4, 255)
bgr = hsv_to_bgr(hsv)
return bgr
```

---

---

**Algorithm 3** approve (imgs, frame\_count)

---

```
sums = ARRAY[]
for i = 0 to frame_count - 1 do
  img = imgs[i]
  if max(img) - min(img)  $\geq$  100 then
    counts = count_unique_values_with_frequency(img, return_counts = True)
    sum = 0
    for i = 0 to len(counts[0]) do
      if counts[0][i]  $\geq$  80 then
        sum = sum + counts[1][i]
      end if
    end for
    append(sums, sum)
  end if
end for
approve_count = 0
for i = 0 to len(sums) do
  if sums[i] > 2000 then
    approve_count = approve_count + 1
  end if
end for
return approve_count  $\geq$  float(0.5625 * frame_count)
```

---

### 1.3 Dataset Examples

We show some clips curated with the help of the above-mentioned algorithms to showcase examples of strong motion clips. These examples are represented by a series of frames from the clips, which can be seen in Figures 1, 2, 3.

## 2 Supplementary files details

Table 1 details the video results found in the folders along with their corresponding file descriptions.

## 3 Limitations

Despite our best efforts to control the flashing artifacts with the proposed intra-clip loss, some flashing still occurs in challenging edge cases. The utilization of 3D CNN in all components of the architecture also leads to an increase in both inference time and memory consumption for stylized video generation, when compared to networks based on 2D CNNs.

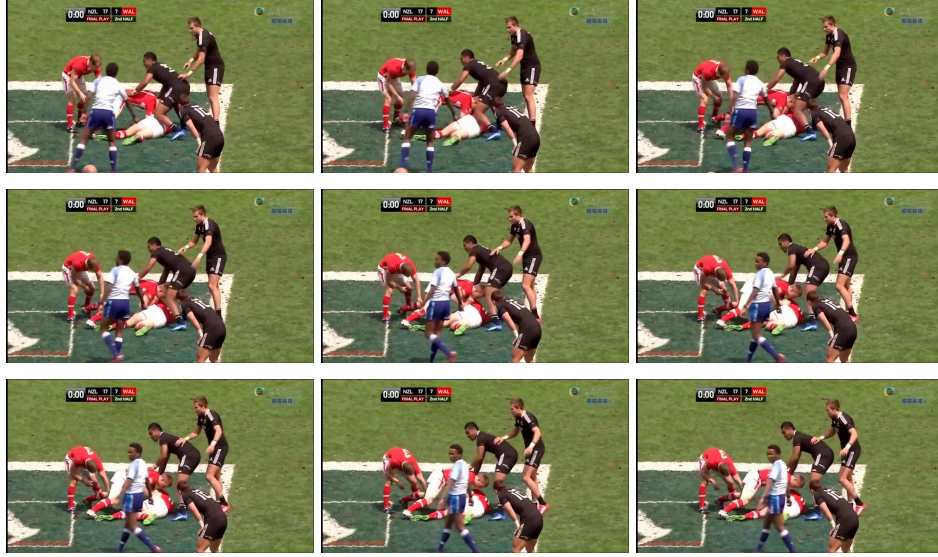

Figure 1: Some examples of our dataset. 1<sup>st</sup>, 3<sup>rd</sup>, 5<sup>th</sup>, 7<sup>th</sup>, 9<sup>th</sup>, 11<sup>th</sup>, 13<sup>th</sup>, 15<sup>th</sup>, 16<sup>th</sup> frames of clip

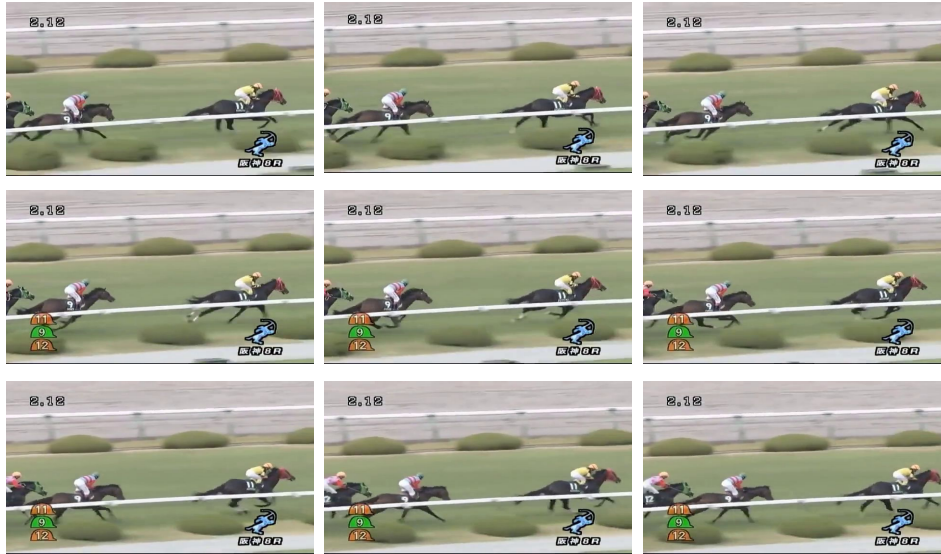

Figure 2: Some examples of our dataset. 1<sup>st</sup>, 3<sup>rd</sup>, 5<sup>th</sup>, 7<sup>th</sup>, 9<sup>th</sup>, 11<sup>th</sup>, 13<sup>th</sup>, 15<sup>th</sup>, 16<sup>th</sup> frames of clip

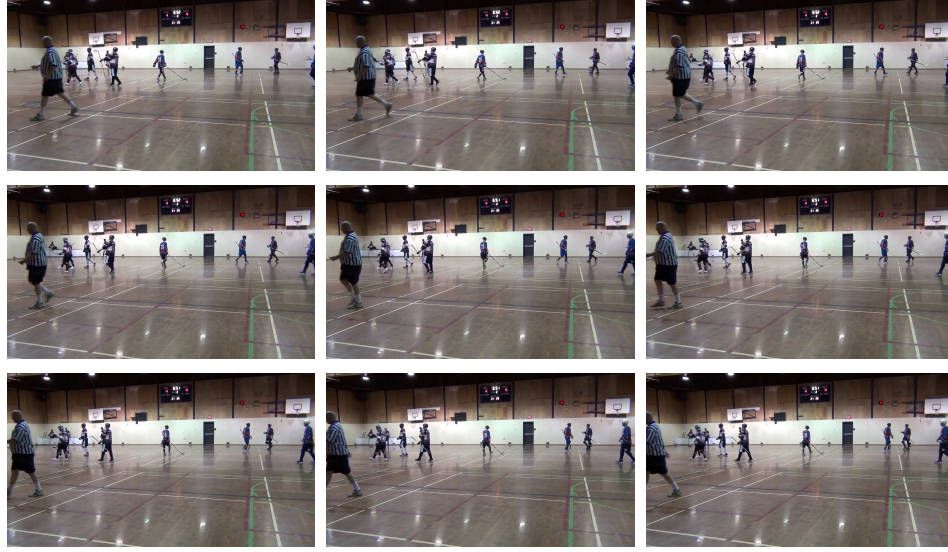

Figure 3: Some examples of our dataset.  $1^{st}$ ,  $3^{rd}$ ,  $5^{th}$ ,  $7^{th}$ ,  $9^{th}$ ,  $11^{th}$ ,  $13^{th}$ ,  $15^{th}$ ,  $16^{th}$  frames of clip

| File Name                                                                                                                                                                                                                                                                    | Description                                                                        |
|------------------------------------------------------------------------------------------------------------------------------------------------------------------------------------------------------------------------------------------------------------------------------|------------------------------------------------------------------------------------|
| Ours Results/basic_results1.mp4<br>Ours Results/basic_results2.mp4<br>Ours Results/basic_results3.mp4<br>Ours Results/basic_results4.mp4                                                                                                                                     | Ours results on different styles of a single content video                         |
| Ours Results/long_video.mp4<br>Ours Results/long_video1.mp4                                                                                                                                                                                                                  | Ours results on different styles of a single long content video                    |
| Comparative Analysis/comparative_study_result1.mp4<br>Comparative Analysis/comparative_study_result2.mp4<br>Comparative Analysis/comparative_study_result3.mp4<br>Comparative Analysis/comparative_study_result4.mp4                                                         | Qualitative comparison between other methods and ours                              |
| Videos_without_intra/basic_results1.mp4<br>Videos_without_intra/basic_results2.mp4<br>Videos_without_intra/basic_results3.mp4<br>Videos_without_intra/basic_results4.mp4                                                                                                     | Ours without Intra-clip loss results on different styles of a single content video |
| Videos_without_temporal/basic_results1.mp4<br>Videos_without_temporal/basic_results2.mp4<br>Videos_without_temporal/basic_results3.mp4<br>Videos_without_temporal/basic_results4.mp4                                                                                         | Ours without temporal loss results on different styles of a single content video   |
| Videos_with_naive_extension_of_2D_stylization/basic_results1.mp4<br>Videos_with_naive_extension_of_2D_stylization/basic_results2.mp4<br>Videos_with_naive_extension_of_2D_stylization/basic_results3.mp4<br>Videos_with_naive_extension_of_2D_stylization/basic_results4.mp4 | Results using naive extension of 2D stylization methods to 3D CNN.                 |

Table 1: File paths and descriptions of all the Supplementary video results found in various folders.

## 4 Network Details

### 4.1 Encoder

We have used pre-trained C3D network and renamed some of the layers of the network for the simplicity of understanding the architecture in Figure 1 in the main paper. The architecture code of encoder is shown in Table 2.

### 4.2 Entangle Subnet

Table 3 details the architecture of Entangle Subnet where weights are pre-initialized such that weights of first half of the layer is given value 0.3 and the other half is given the value 0.7.

### 4.3 Appearance Subnets

We designed the architecture layers based on the number of channels in the output feature maps of the C3D network i.e. the feature map with most number of channels will have the corresponding appearance map with high number of layers. Table 4 represents architecture of Appearance Subnet 1.



| Layer     | Layer Size                       | Stride    | Output Size                          | Stage |
|-----------|----------------------------------|-----------|--------------------------------------|-------|
| Input     |                                  | 1         | $3 \times 16 \times 128 \times 128$  |       |
| Conv      | $3 \times 3 \times 3 \times 3$   | 0         | $3 \times 16 \times 128 \times 128$  |       |
| Conv+RELU | $64 \times 3 \times 3 \times 3$  | 1         | $64 \times 16 \times 128 \times 128$ | F1    |
| MaxPool   |                                  | (1, 2, 2) | $64 \times 16 \times 64 \times 64$   | F2    |
| Conv+RELU | $128 \times 3 \times 3 \times 3$ | 1         | $128 \times 16 \times 64 \times 64$  | F3    |
| MaxPool   |                                  | 2         | $128 \times 8 \times 32 \times 32$   | F4    |
| Conv+RELU | $256 \times 3 \times 3 \times 3$ | 1         | $256 \times 8 \times 32 \times 32$   | F5    |
| Conv+RELU | $256 \times 3 \times 3 \times 3$ | 1         | $256 \times 8 \times 32 \times 32$   | F6    |
| MaxPool   |                                  | 2         | $256 \times 4 \times 16 \times 16$   | F7    |
| Conv+RELU | $512 \times 3 \times 3 \times 3$ | 1         | $512 \times 4 \times 16 \times 16$   | F8    |

Table 2: Architecture of Encoder where Stage represents different intermediate feature maps.

| Layer        | Layer Size                       | Stride | Output Size                         | Stage |
|--------------|----------------------------------|--------|-------------------------------------|-------|
| Input        |                                  |        | $1024 \times 4 \times 16 \times 16$ |       |
| Concat F8+F9 |                                  |        |                                     |       |
| Conv+RELU    | $512 \times 1 \times 1 \times 1$ | 1      | $512 \times 4 \times 16 \times 16$  | F13   |

Table 3: Architecture of Entangle Subnet where Stage represents different intermediate feature maps.

| Layer                  | Layer Size                       | Stride | Output Size                        | Stage |
|------------------------|----------------------------------|--------|------------------------------------|-------|
| Input                  |                                  |        | $512 \times 4 \times 16 \times 16$ |       |
| (Conv+RELU) $\times 4$ | $512 \times 3 \times 3 \times 3$ | 1      | $512 \times 4 \times 16 \times 16$ |       |
| Conv+RELU              | $512 \times 1 \times 1 \times 1$ | 1      | $512 \times 4 \times 16 \times 16$ | F9    |

Table 4: Architecture of Appearance Subnet 1 where Stage represents different intermediate feature maps.

The table 5 represents architecture of Appearance subnet 2.

| Layer                  | Layer Size                       | Stride | Output Size                        | Stage |
|------------------------|----------------------------------|--------|------------------------------------|-------|
| Input                  |                                  |        | $256 \times 8 \times 32 \times 32$ |       |
| (Conv+RELU) $\times 3$ | $256 \times 3 \times 3 \times 3$ | 1      | $256 \times 8 \times 32 \times 32$ |       |
| Conv+RELU              | $256 \times 1 \times 1 \times 1$ | 1      | $256 \times 8 \times 32 \times 32$ | F10   |

Table 5: Architecture of Appearance Subnet 2 where Stage represents different intermediate feature maps.

The table 6 represents architecture of Appearance subnet 3.

| Layer                  | Layer Size                       | Stride | Output Size                         | Stage |
|------------------------|----------------------------------|--------|-------------------------------------|-------|
| Input                  |                                  |        | $128 \times 16 \times 64 \times 64$ |       |
| (Conv+RELU) $\times 2$ | $128 \times 3 \times 3 \times 3$ | 1      | $128 \times 16 \times 64 \times 64$ |       |
| Conv+RELU              | $128 \times 1 \times 1 \times 1$ | 1      | $128 \times 16 \times 64 \times 64$ | F11   |

Table 6: Architecture of Appearance Subnet 3 where Stage represents different intermediate feature maps.

The table 7 represents architecture of Appearance subnet 4.

| Layer     | Layer Size                      | Stride | Output Size                          | Stage |
|-----------|---------------------------------|--------|--------------------------------------|-------|
| Input     |                                 |        | $64 \times 16 \times 128 \times 128$ |       |
| Conv+RELU | $64 \times 3 \times 3 \times 3$ | 1      | $64 \times 16 \times 128 \times 128$ |       |
| Conv+RELU | $64 \times 1 \times 1 \times 1$ | 1      | $64 \times 16 \times 128 \times 128$ | F12   |

Table 7: Architecture of Appearance Subnet 4 where Stage represents different intermediate feature maps.

#### 4.4 Decoder

The architecture of 3D CNN decoder is inspired from the C3D encoder mentioned above. We break the decoder into four parts where starting of each part takes output of appearance subnet concatenated channel-wise with the output of the previous part of the decoder. The architecture of decoder is detailed in Table 8.

| Layer                  | Layer Size                       | Stride                          | Output Size                           | Stage |
|------------------------|----------------------------------|---------------------------------|---------------------------------------|-------|
| Input F13              |                                  |                                 | $512 \times 4 \times 16 \times 16$    |       |
| (Conv+RELU) $\times 2$ | $256 \times 3 \times 3 \times 3$ | 1                               | $256 \times 4 \times 16 \times 16$    |       |
| Upsample               |                                  | $\frac{1}{2}$                   | $256 \times 8 \times 32 \times 32$    | Part0 |
| Concat F6              |                                  |                                 | $512 \times 8 \times 32 \times 32$    |       |
| (Conv+RELU) $\times 2$ | $256 \times 3 \times 3 \times 3$ | 1                               | $256 \times 8 \times 32 \times 32$    |       |
| Upsample               |                                  | $\frac{1}{2}$                   | $256 \times 16 \times 64 \times 64$   | Part1 |
| Concat F3              |                                  |                                 | $384 \times 16 \times 64 \times 64$   |       |
| Conv+RELU              | $384 \times 3 \times 3 \times 3$ | 1                               | $384 \times 16 \times 64 \times 64$   |       |
| (Conv+RELU) $\times 2$ | $256 \times 3 \times 3 \times 3$ | 1                               | $256 \times 16 \times 64 \times 64$   |       |
| Conv+RELU              | $128 \times 3 \times 3 \times 3$ | 1                               | $128 \times 16 \times 64 \times 64$   |       |
| Conv+RELU              | $128 \times 3 \times 3 \times 3$ | 1                               | $128 \times 18 \times 66 \times 66$   |       |
| Conv+RELU              | $64 \times 3 \times 3 \times 3$  | 1                               | $64 \times 16 \times 64 \times 64$    |       |
| Upsample               |                                  | $(1, \frac{1}{2}, \frac{1}{2})$ | $64 \times 16 \times 128 \times 128$  | Part2 |
| Concat F1              |                                  |                                 | $128 \times 16 \times 128 \times 128$ |       |
| Conv+RELU              | $128 \times 3 \times 3 \times 3$ | 1                               | $128 \times 16 \times 128 \times 128$ |       |
| Conv+RELU              | $64 \times 3 \times 3 \times 3$  | 1                               | $64 \times 16 \times 128 \times 128$  |       |
| Conv+RELU              | $3 \times 3 \times 3 \times 3$   | 1                               | $3 \times 16 \times 128 \times 128$   | Part3 |

Table 8: Architecture of Decoder where Stage represents different components of Decoder.

#### References

- [1] Brandon Castellano. PySceneDetect library for shot boundary detection, 2022.
- [2] Gunnar Farnebäck. Two-frame motion estimation based on polynomial expansion. In *Scandinavian Conference on Image Analysis*, 2003.
- [3] Tomáš Souček and Jakub Lokoč. Transnet v2: an effective deep network architecture for fast shot transition detection. *arXiv preprint arXiv:2008.04838*, 2020.
